# Supplementary material for: The poly(ethylene glycol) assisted preparation of NH4TiOF3 mesocrystals and their topotactic conversion to TiO2
Source: Royal Society of Chemistry journal article supplement (doi:10.1039/c2jm30872j), 2012-01-01
Supplement: c2jm30872j.pdf [file c2jm30872j.pdf]

## Supplementary Information

### **The Poly(ethylene glycol) Assisted Preparation of $\text{NH}_4\text{TiOF}_3$ Mesocrystals and Their Topotactic Conversion to $\text{TiO}_2$**

Masashi Inoguchi<sup>a,b</sup> Mohammad Afzaal<sup>b,c</sup> Nobuhiko Tanaka<sup>a</sup> and Paul O'Brien<sup>\*b</sup>

<sup>a</sup>Murata Manufacturing Co. Ltd., Nagaokakyo-shi, Kyoto 617-8555, Japan

<sup>b</sup>The Manchester Materials Science Centre and The School of Chemistry, The University of Manchester, Oxford Road, Manchester, M13 9PL, UK. United Kingdom. E.mail: paul.obrien@manchester.ac.uk

<sup>c</sup>Center of Research Excellence in Renewable Energy, King Fahd University of Petroleum and Minerals, PO Box 1292, Dhahran, 31261 Saudi Arabia

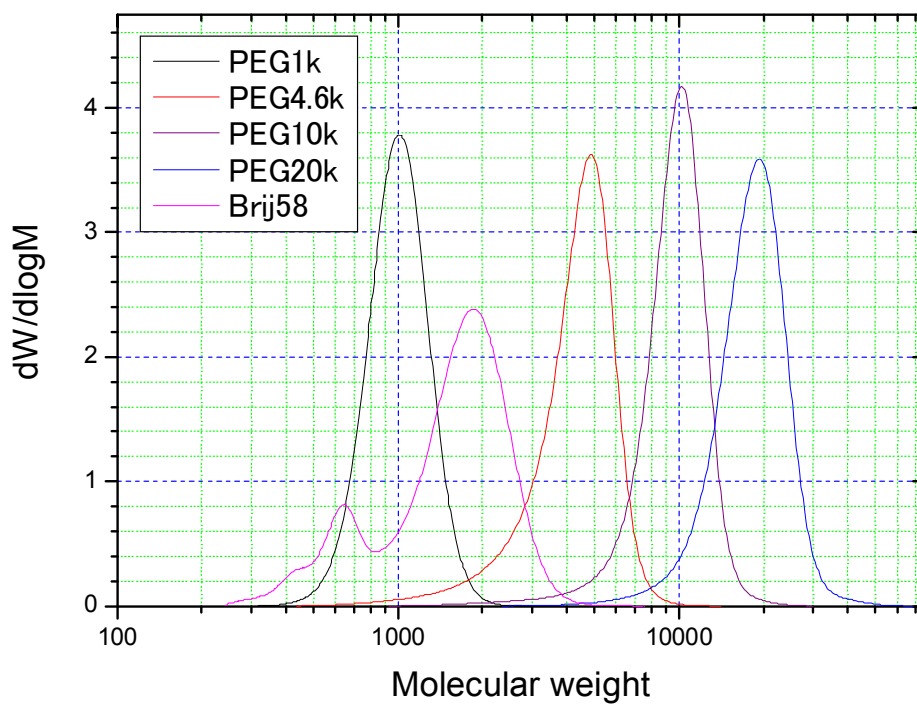

**Fig. S1** Molecular weight of spectra of PEG and Brij solutions.
